# Supplementary material for: Structural Equation Modelling of Perception for Sustainable Agriculture as Climate Change Mitigation Strategy in Ghana
Source: Research Square preprint supplement (doi:10.21203/rs.3.rs-150718/v1), 2021-01-21
Supplement: Supplementary file 1 [file ad984833ac0a4c04ebd85e98.xlsx]

## Sheet: Sustainable Agric SmartPLS
ID	GEN	IR1	IR2	IR3	IR4	IR5	S5	S1	S2	S3	S4	ASAP1	ASAP2	ASAP4	ASAP5	ASAP6	ASAP7	ASAP8
1	1	5	7	7	6	6	5	4	6	7	7	5	7	2	2	2	1	1
2	1	7	7	7	7	7	7	7	7	7	7	3	1	1	1	1	1	1
3	1	6	6	6	6	6	6	6	6	5	5	2	2	2	2	2	2	2
4	1	7	7	7	7	6	7	7	7	7	7	1	1	1	1	1	1	1
5	1	1	1	1	1	1	1	1	2	1	1	7	7	7	7	7	7	7
6	1	7	7	7	7	7	7	7	7	7	6	1	1	1	1	1	1	1
7	1	7	7	7	7	7	7	7	7	7	7	1	1	1	1	1	1	4
8	1	7	7	7	7	7	7	7	6	6	6	1	1	1	1	1	1	1
9	1	7	5	5	5	6	5	4	5	5	7	6	6	4	5	4	3	3
10	1	7	7	7	7	7	7	7	7	7	7	1	1	1	1	1	1	1
11	1	6	7	7	7	7	7	7	7	7	7	2	1	1	1	1	1	2
12	2	6	7	7	7	5	7	6	6	6	6	2	2	1	1	1	1	2
13	1	7	7	6	7	6	7	7	6	7	6	2	2	1	4	4	2	1
14	1	7	7	7	7	6	6	7	6	6	5	1	1	1	1	1	1	1
15	1	7	7	7	7	7	7	7	7	7	7	1	1	1	1	1	1	1
16	1	7	7	7	7	7	7	7	7	7	7	1	1	1	1	1	1	3
17	1	6	7	7	7	6	7	6	5	6	4	2	1	1	1	1	1	2
18	2	7	7	7	7	7	7	7	7	7	7	1	1	1	1	1	1	1
19	2	7	7	7	7	7	7	7	6	7	6	1	1	1	1	1	1	3
20	2	6	7	6	7	6	6	6	6	4	5	2	1	1	2	1	1	3
21	1	7	7	7	6	6	7	7	7	6	5	2	2	1	1	1	2	1
22	1	7	7	7	6	6	7	6	7	4	6	2	2	1	1	1	1	2
23	1	6	6	7	6	5	7	5	7	5	5	2	2	1	1	1	1	1
24	1	6	7	7	7	7	7	7	5	1	3	6	1	1	1	1	1	3
25	1	5	7	7	7	5	6	7	7	7	6	1	1	1	1	1	1	1
26	1	6	7	7	6	6	6	5	6	6	6	1	1	2	1	2	1	1
27	1	7	6	6	5	6	5	4	6	3	6	1	1	3	2	1	3	2
28	2	7	7	7	7	6	7	7	6	6	6	7	7	7	7	7	7	7
29	1	7	3	7	7	7	7	1	7	7	1	1	1	1	1	1	1	1
30	1	6	6	5	5	5	5	6	6	6	5	6	7	6	6	5	6	5
31	2	6	6	7	7	6	7	6	7	5	6	1	1	1	1	1	1	1
32	2	7	6	7	7	7	7	6	7	7	7	3	1	1	1	1	1	1
33	1	7	7	6	7	7	7	6	7	7	7	2	1	1	2	1	1	1
34	1	7	7	7	7	7	7	7	7	7	7	1	1	2	1	1	1	3
35	1	7	7	7	7	7	7	7	7	7	7	1	1	1	1	1	1	1
36	1	6	1	7	7	6	7	6	7	6	6	1	1	1	1	1	1	1
37	1	7	7	7	7	7	7	7	7	7	7	1	1	1	1	1	1	1
38	1	6	7	7	7	7	7	7	7	6	6	1	1	1	1	1	1	1
39	1	6	7	7	7	6	6	6	6	6	4	2	1	1	1	1	2	1
40	1	6	7	7	5	5	7	7	6	5	4	2	1	2	4	1	1	2
41	2	7	6	7	7	7	7	6	7	7	7	1	1	1	1	1	1	1
42	1	7	7	7	7	7	7	7	7	7	7	1	1	1	1	1	1	1
43	1	7	7	7	7	7	7	7	7	7	7	1	1	1	1	1	1	1
44	2	6	4	5	6	4	6	6	4	5	4	2	2	2	2	2	2	2
45	1	7	7	7	7	6	7	6	6	6	7	4	1	1	1	1	1	1
46	2	6	7	7	6	3	7	7	7	7	6	4	1	1	1	1	1	1
47	1	6	7	7	7	7	7	7	7	7	7	5	1	1	1	1	1	2
48	2	6	5	7	7	6	6	5	7	7	7	7	4	7	7	7	7	7
49	2	6	7	7	7	7	6	5	7	7	6	2	1	1	1	1	1	1
50	2	7	7	7	7	7	7	7	7	7	7	7	1	1	1	1	1	1
51	1	5	6	7	6	5	6	5	5	5	5	4	2	2	2	1	2	2
52	1	7	7	7	7	7	7	7	6	5	6	1	1	1	1	1	1	1
53	2	7	7	7	7	7	6	6	7	6	5	1	1	1	1	1	1	1
54	1	6	7	6	5	7	6	4	5	5	5	3	1	2	7	2	3	2
55	1	6	7	7	7	7	7	7	7	3	6	2	1	1	1	1	1	1
56	1	7	7	7	7	7	7	7	7	7	7	1	1	1	1	1	1	1
57	2	7	7	7	6	5	6	7	7	6	7	1	1	1	1	1	1	1
58	1	6	6	6	6	6	6	6	6	6	6	6	6	6	6	6	6	6
59	1	7	7	7	7	7	7	7	7	5	5	1	1	1	1	1	1	1
60	1	7	7	7	7	7	7	7	7	5	5	1	1	1	1	1	1	1
61	1	4	5	6	6	4	6	6	6	6	7	4	4	4	3	3	3	1
62	2	6	7	7	7	7	7	5	6	7	6	4	5	3	3	3	3	1
63	1	6	7	7	7	7	7	7	7	6	7	1	1	1	1	1	1	1
64	2	5	7	7	7	5	7	7	6	3	6	7	1	1	3	3	1	1
65	1	7	7	7	7	6	7	7	7	6	6	1	1	1	1	1	1	2
66	1	6	7	7	5	5	6	6	4	6	5	2	1	2	2	2	2	2
67	2	6	6	7	6	6	7	7	7	6	6	1	1	2	2	1	2	3
68	1	6	7	7	6	7	7	7	7	7	7	2	1	2	1	1	2	2
69	1	6	7	6	6	5	6	4	7	7	5	2	2	2	3	1	2	3
70	2	7	7	7	6	7	6	6	7	6	6	1	1	2	1	2	2	2
71	2	6	7	7	7	7	7	7	7	7	7	1	1	1	1	1	1	1
72	1	4	7	7	7	7	7	7	5	5	6	1	1	1	1	1	1	1
73	1	3	6	7	5	4	5	4	7	7	7	1	2	1	3	1	1	1
74	1	7	7	7	7	7	7	7	6	2	5	1	1	1	7	1	1	1
75	2	1	1	1	7	7	7	7	7	7	7	1	1	1	1	1	1	1
76	1	7	7	7	7	5	7	7	7	7	7	1	1	1	1	1	1	1
77	2	7	7	7	7	7	7	7	7	7	7	1	1	1	1	1	1	1
78	2	7	6	7	6	5	6	7	6	5	5	2	1	1	1	1	1	2
79	1	4	7	7	7	7	5	6	7	7	6	2	1	1	1	1	1	1
80	1	3	7	7	7	7	7	5	7	7	7	5	6	4	4	5	7	7
81	1	7	7	7	7	7	7	7	7	7	7	1	1	1	1	1	1	1
82	1	7	7	7	7	6	7	6	6	7	6	1	1	1	1	2	2	2
83	1	7	7	7	7	7	7	6	6	7	5	1	2	3	1	2	2	2
84	2	5	6	6	5	5	6	6	5	6	5	2	1	4	2	3	4	3
85	1	6	7	7	7	6	6	6	6	7	1	3	2	3	1	3	5	4
86	2	6	7	6	7	5	5	6	6	7	7	1	2	3	4	4	3	4
87	1	7	7	7	7	5	6	6	7	7	7	1	1	1	1	1	1	1
88	1	6	7	5	7	4	4	6	7	7	5	2	1	2	1	2	3	3
89	2	7	6	7	7	5	6	7	7	7	7	1	1	3	1	1	1	1
90	1	7	7	7	7	6	5	6	7	5	6	1	1	3	3	4	1	2
91	1	6	7	7	7	5	6	7	7	7	5	1	1	3	2	4	2	2
92	2	7	7	7	7	7	7	7	7	7	7	1	1	1	1	1	1	1
93	1	7	7	7	7	7	7	6	6	6	7	1	1	1	1	2	1	2
94	1	6	6	6	6	6	6	6	6	6	6	1	1	1	1	1	1	1
95	1	7	7	7	7	7	7	7	5	7	2	1	1	1	1	1	1	1
96	1	7	7	7	7	6	6	7	6	6	7	1	1	2	2	1	2	1
97	1	7	7	7	7	7	6	6	7	7	6	1	1	1	1	2	2	2
98	1	7	7	7	7	7	7	7	7	7	7	1	1	1	1	1	1	1
99	2	6	7	7	7	7	7	7	7	6	7	1	1	1	1	1	1	2
100	2	7	7	7	7	7	7	7	7	7	7	1	1	1	1	1	1	1
101	1	7	7	7	7	7	7	7	7	7	7	1	1	1	1	1	1	1
102	2	6	6	6	6	6	6	6	6	6	3	1	1	1	1	1	1	1
103	1	4	7	7	7	7	7	7	7	7	6	1	1	1	2	1	1	1
104	2	6	7	6	7	7	7	7	7	7	7	1	1	1	1	1	1	1
105	2	5	7	7	7	7	7	7	7	6	6	6	6	6	6	7	6	7
106	1	7	7	7	7	7	7	6	7	7	7	1	1	1	1	1	1	1
107	1	7	7	7	7	6	7	7	6	7	6	1	1	2	1	2	2	1
108	2	7	7	7	7	6	6	6	7	7	7	1	1	3	1	2	3	2
109	1	7	7	7	7	6	5	6	6	7	6	1	1	1	1	2	2	2
110	1	7	7	7	7	7	7	6	7	7	6	1	1	1	1	2	2	1
111	1	7	7	7	7	6	6	6	6	7	6	1	1	2	1	2	2	3
112	2	7	7	7	7	7	7	7	7	7	7	1	1	1	1	1	1	1
113	1	7	7	7	7	7	7	7	6	6	6	1	2	1	1	3	1	3
114	2	6	7	7	7	7	7	5	7	6	6	1	1	1	1	2	1	2
115	1	6	7	7	7	7	7	7	6	6	6	1	1	1	1	1	1	2
116	2	7	7	7	7	7	7	7	7	7	6	1	1	1	1	2	1	1
117	1	6	7	7	7	7	7	6	7	6	7	1	1	1	1	2	1	1
118	2	6	7	7	7	7	7	6	6	7	6	1	1	1	1	1	1	1
119	1	7	7	7	7	6	7	7	7	6	6	1	1	1	1	1	1	2
120	1	5	7	7	7	6	7	6	5	4	6	6	1	1	1	3	1	2
